# Supplementary material
Source: PubMed Central journal article supplement (PMC5055450)
Supplement: NIHMS809554-supplement-Supp_Fig_S1-3.pdf [file NIHMS809554-supplement-Supp_Fig_S1-3.pdf]

# Supplementary Material

**Spirochetes flagellar collar proteins have astounding effects in orientation of periplasmic flagella, bacterial shape, motility, and stability of motors in *Borrelia burgdorferi***

Ki Hwan Moon<sup>a</sup>, Xiaowei Zhao<sup>b</sup>, Akarsh Manne<sup>a</sup>, Juyu Wang<sup>b</sup>, Zhou Yu<sup>a</sup>, Jun Liu<sup>b\*</sup>, and Md A. Motaleb<sup>a\*</sup>

<sup>a</sup>Department of Microbiology and Immunology, Brody School of Medicine, East Carolina University, Greenville, North Carolina, USA; <sup>b</sup>Department of Pathology and Laboratory Medicine, University of Texas Health Science Center, Houston, Texas, USA.

Running title: FlbB is crucial for flagellar orientation and collar assembly

\*Correspondence: MD A. MOTALEB, E-mail: [motalebm@ecu.edu](mailto:motalebm@ecu.edu) or JUN LIU, E-mail: [Jun.Liu.1@uth.tmc.edu](mailto:Jun.Liu.1@uth.tmc.edu)

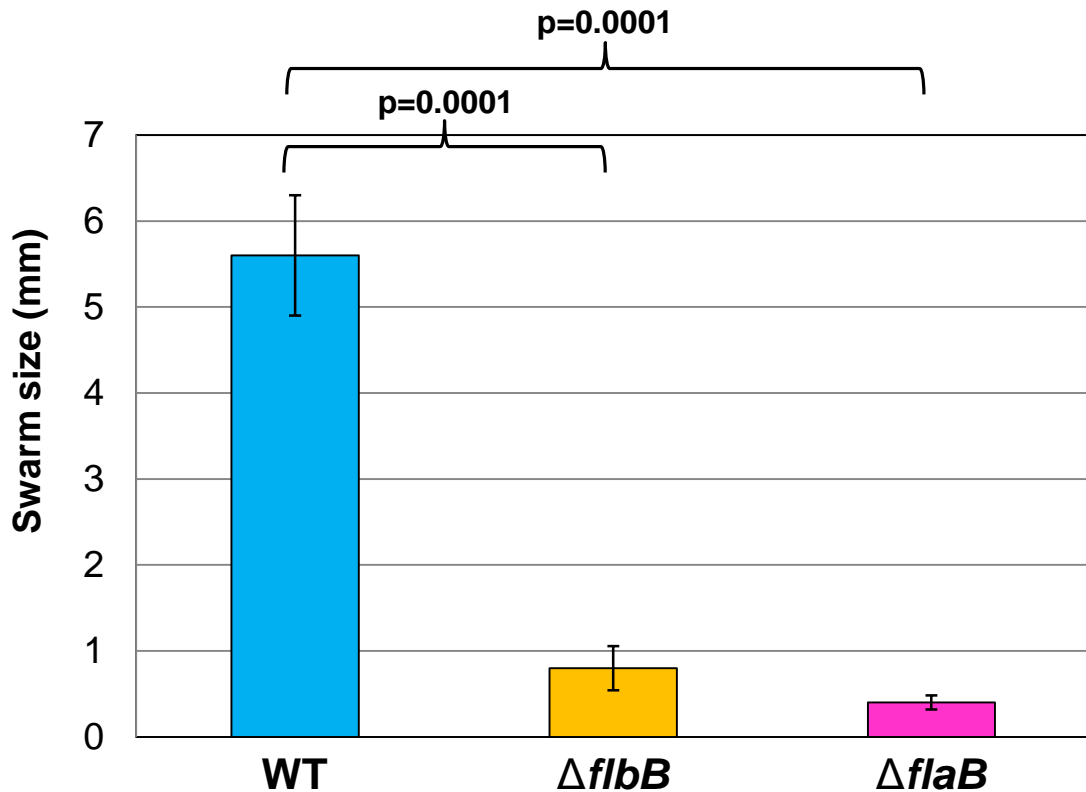

**Fig S1.  $\Delta flbB$  mutant cells are completely non-motile.** Swarm plate motility assays in 0.4% agarose.  $\Delta flbB$  mutant cells display significantly reduced swarming compared to WT cells. Individual colony's swarm ability was measured four weeks after inoculation. The colony size of each clone is measured in millimeters. Non-motile, flagellin-deficient  $\Delta flaB$  mutant was used as a control. Values are indicative of the mean  $\pm$  standard deviation of the averages from at least 3 plates (or 20 individual colonies) per strain. P-values between samples are shown at the top.

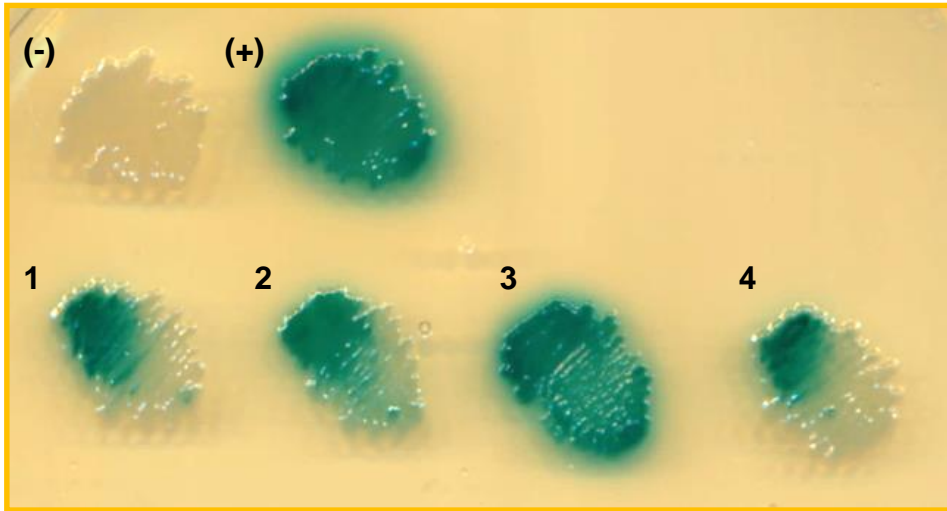

**Fig S2. BACTH assays showing the interaction between FlbB and FliL, and self-interactions of FlbB-FlbB or FliL-FliL.** *E. coli* cells harboring *flbB* or *fliL* gene in the vector pUT18C or pKT25 was transformed on a plate containing X-gal. Appearance of blue colored colonies indicate a positive protein-protein interaction. (-), negative control; (+), positive control; 1, pUT18C::*flbB*—pKT25::*fliL* co-transformant; 2, pUT18C::*fliL*—pKT25::*flbB* co-transformant; 3, pUT18C::*fliL*—pKT25::*fliL* co-transformant; 4, pUT18C::*flbB*—pKT25::*flbB* co-transformant.

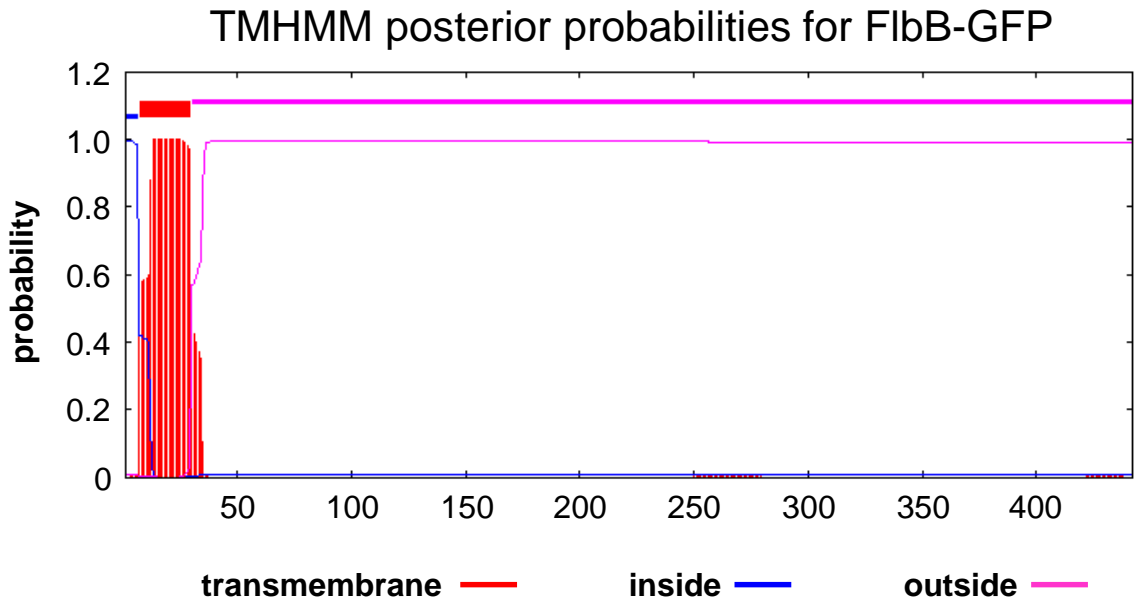

# FlbB-GFP full-length: 442 a.a. (FlbB 1-205/GFP 206-442)

# FlbB-GFP No. of predicted transmembrane (TM) helix: 1

FlbB-GFP TMHMM2.0 inside      1-6 a.a.

FlbB-GFP TMHMM2.0 TM helix    7-29 a.a.

FlbB-GFP TMHMM2.0 outside    30-442 a.a.

**Fig S3. Transmembrane domain prediction of FlbB-GFP fusion protein.** FlbB possesses a transmembrane domain as predicted by TMHMM Server ver. 2.0 software with default options. Predicted transmembrane region is indicated by red box (7-29 amino acid residues). FlbB-GFP amino acid sequence was used for the prediction.
